# Supplementary material for: From Micro to Nano: Grinding Natural Magnetite Ore for Microalgae Harvesting
Source: MDPI journal article supplement (doi:10.3390/magnetochemistry9060149), 2023-06-05
Supplement: s1 [file s1]

## Supporting Information

### From Micro to Nano: Grinding Natural Magnetite Ore for Microalgae Harvesting

Michael Schobesberger<sup>a</sup>, Simone Helmhagen<sup>a</sup>, Stefan Mende<sup>b</sup>, Sonja Berensmeier<sup>a</sup>,  
Paula Fraga-García<sup>a,\*</sup>

<sup>a</sup>Chair of Bioseparation Engineering, School of Engineering and Design, Technical  
University of Munich, Boltzmannstraße 15, 85748 Garching, Germany

<sup>b</sup>Netzsch-Feinmahltechnik GmbH, Sedanstraße 70, 95100 Selb, Germany

Figure S1. Particle size distribution for magnetite ore EX009

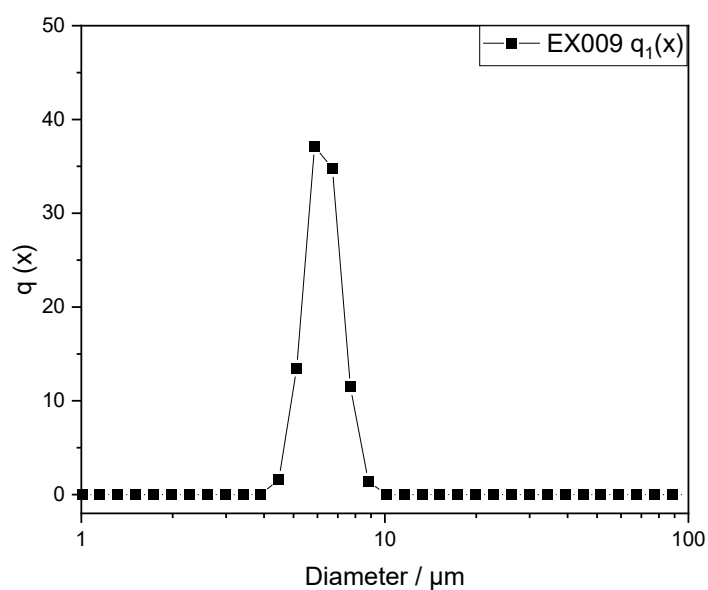

Figure S1 Particle size distribution for magnetite ore EX009 measured by SLS

Figure S2 Particle size during grinding with PM100 in different solvents

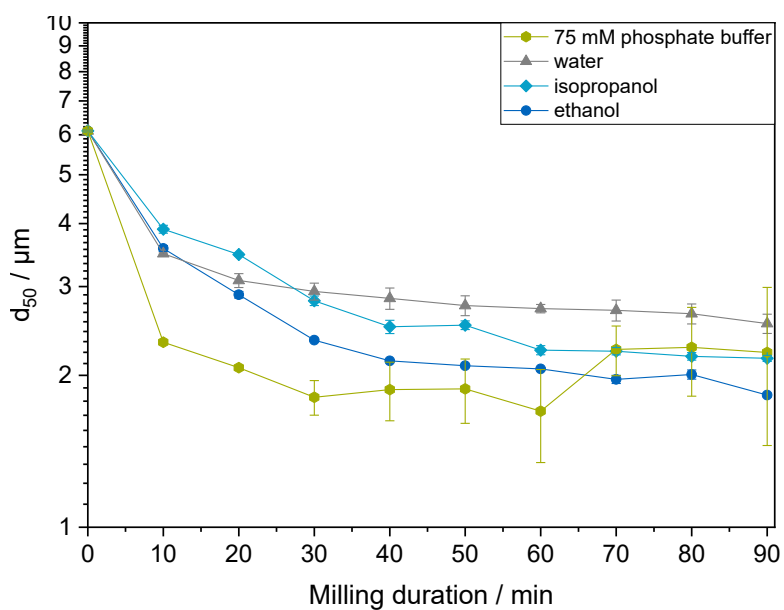

Figure S2 Particle size during grinding with planetary ball mill PM100 in different solvents

Figure S3 Specific surface and SLS diameter for PM100 ground particles in different solvents

| Bead size          | 1 mm                                 |                          |
|--------------------|--------------------------------------|--------------------------|
| Solvent            |                                      |                          |
|                    | BET / m <sup>2</sup> g <sup>-1</sup> | SLS d <sub>50</sub> / μm |
|                    | measured                             | measured                 |
| ddH <sub>2</sub> O | 47.34                                | 2.53                     |
| Isopropanol        | 32.21                                | 2.12                     |
| EtOH               | 28.38                                | 1.82                     |
| Phosphate          | 49.60                                | 2.22                     |

Figure S3 Specific surface and SLS diameter for PM100 ground particles in different solvents

Figure S4 Microscopic pictures of magnetite particles after grinding in PM100 in different solvents

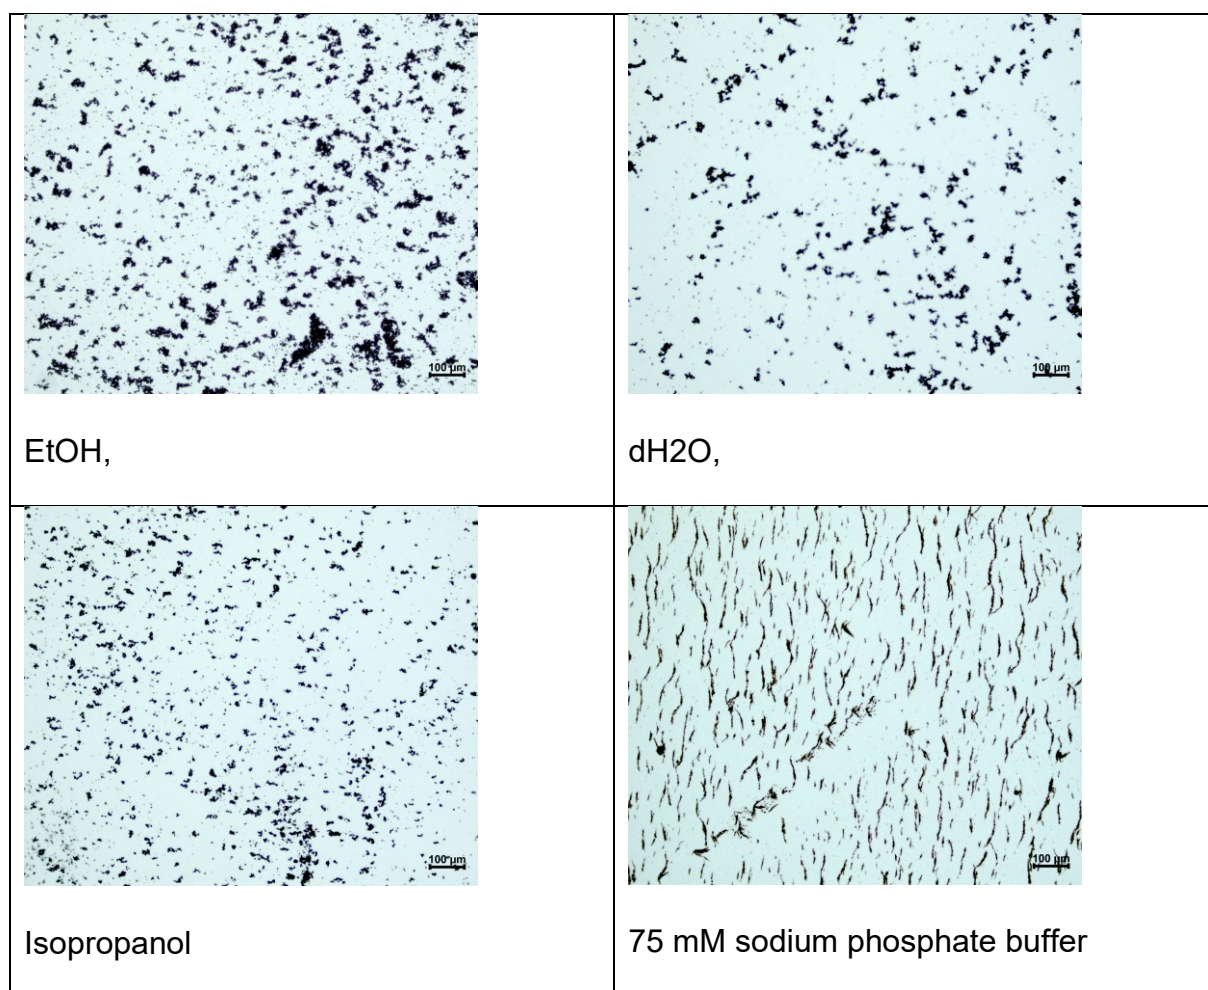

Figure S4 Microscopic pictures of magnetite particles after grinding in PM100 in different solvents for 90 min with 1 mm zirconia beads, 100x magnification

Figure S5 Harvesting efficiency of *M. salina* with different particle concentrations

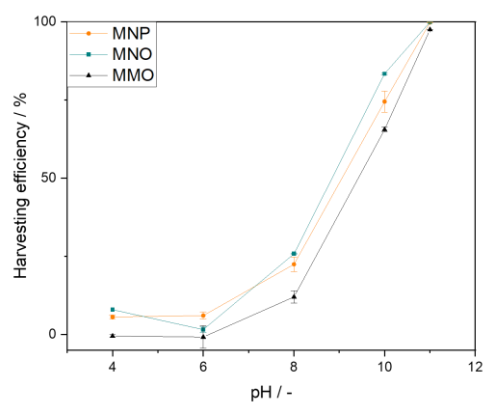

Harvesting of 1 g L<sup>-1</sup> *M. salina* with 2.5 m<sup>2</sup> magnetite in Artificial Sea Water at different pH.

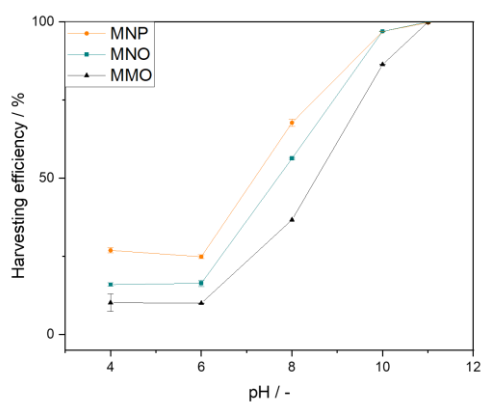

Harvesting of 1 g L<sup>-1</sup> *M. salina* with 25 m<sup>2</sup> magnetite in Artificial Sea Water at different pH.

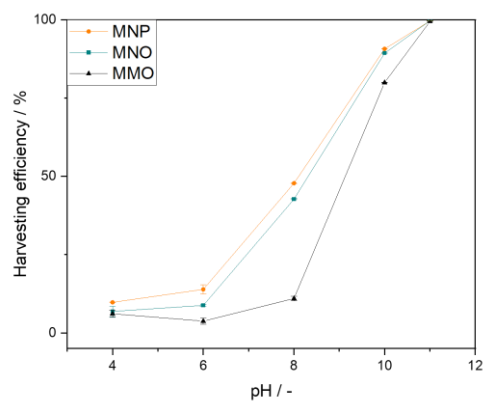

Harvesting of 1 g L<sup>-1</sup> *M. salina* with 0.1 g L<sup>-1</sup> magnetite in Artificial Sea Water at different pH.

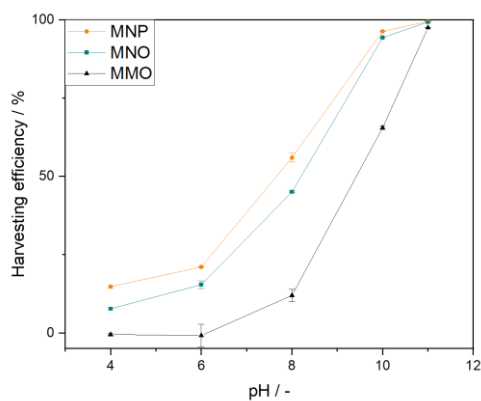

Harvesting of 1 g L<sup>-1</sup> *M. salina* with 1 g L<sup>-1</sup> magnetite in Artificial Sea Water at different pH.

Figure S5 Harvesting efficiency of *M. salina* with different particles and concentrations
